# Supplementary material for: Spillover of a biological control agent (Chrysolina quadrigemina) onto native St. Johnswort (Hypericum punctatum)
Source: PeerJ. 2016 Mar 31;4:e1886. doi: 10.7717/peerj.1886 (PMC4824895; doi:10.7717/peerj.1886)
Supplement: Supplemental Information 2 [file peerj-04-1886-s002.xlsx]

## Sheet: Sheet4
Row Labels	Average of height (cm)
perf	42.5849														perf	42.5849			1.19241
punc	36.9259														punc	36.9259
(blank)
Grand Total	39.729

## Sheet: Sheet1
Transect	Number	Distance (m)	Species	stalks	Relative Height	height (cm)	leaves	damaged	heavily damaged	Competitor Ht (cm)	Tallest Competitor	Predominant Competitor	Total Competitor Mass	Hypericum mass	Proportion damaged	Proportion Heavily Damaged	Damage Level	Heavy Damage Level
A	1	0	punc	6	1.19157	44	40	2	0	130	goldenrod	forbs	145.6	3.9	0.05	0	Low	None
A	2	5	punc	2	1.11033	41	30	7	1	120	grass	mix	205.6	3.8	0.233333	0.0333333	Low	Low
A	3	10	punc	2	0.622869	23	36	2	0	120	grass	grass	98.2	1.4	0.0555556	0	Low	None
A	4	15	punc	1	0.704112	26	86	78	74	130	grass	grass	79.1	1	0.906977	0.860465	High	High
A	5	20	punc	3	1.00201	37	58	31	14	100	goldenrod	forbs	98.2	2.2	0.534483	0.241379	High	Low
A	6	25	punc	1	0.4333	16	64	41	15	130	goldenrod	forbs	164.9	1.5	0.640625	0.234375	High	Low
A	7	30	punc	4	0.8666	32	52	27	19	82	forb	forbs	125.4	1.6	0.519231	0.365385	High	High
A	8	35	punc	3	1.19157	44	86	14	0	79	forb	mix	299	3.5	0.162791	0	Low	None
A	9	40	punc	1	1.13741	42	72	24	8	55	forb	mix	119.4	3.4	0.333333	0.111111	High	Low
A	10	45	punc	5	0.974925	36	38	11	3	97	grass	grass	136.4	2.6	0.289474	0.0789474	Low	Low
A	11	50	punc	9	0.893681	33	80	16	0	120	goldenrod	mix	210	2.4	0.2	0	Low	None
A	1	0	perf	3	0.704475	30	38	5	2	121	goldenrod	mix	132.9	0.2	0.131579	0.0526316	Low	Low
A	2	5	perf	4	1.40895	60	48	1	0	94	grass	grass	270.5	1.9	0.0208333	0	Low	None
A	3	10	perf	5	0.986265	42	164	7	1	124	grass	mix	175	1.6	0.0426829	0.00609756	Low	Low
A	4	15	perf	3	0.915817	39	68	68	68	99	forb	mix	105.9	0.5	1	1	High	High
A	5	20	perf	7	0.774922	33	34	29	25	117	grass	mix	114.2	0.7	0.852941	0.735294	High	High
A	6	25	perf	3	1.03323	44	44	16	7	130	grass	mix	250.8	1	0.363636	0.159091	High	Low
A	7	30	perf	8	0.892335	38	110	9	5	112	grass	mix	134.4	4.4	0.0818182	0.0454545	Low	Low
A	8	35	perf	8	1.08019	46	70	2	0	120	grass	grass	164.2	2.4	0.0285714	0	Low	None
A	9	40	perf	6	0.986265	42	66	20	5	108	grass	grass	131.9	1.2	0.30303	0.0757576	High	Low
A	10	45	perf	4	1.05671	45	46	2	0	117	goldenrod	mix	158	1.2	0.0434783	0	Low	None
A	11	50	perf	5	0.986265	42	110	10	5	130	grass	grass	156.5	1.8	0.0909091	0.0454545	Low	Low
B	1	0	punc	4	1.38114	51	24	3	0	126	grass	grass	157.8	2.7	0.125	0	Low	None
B	2	5	punc	2	1.16449	43	22	17	0	115	grass	grass	210.9	1.1	0.772727	0	High	None
B	3	10	punc	7	1.00201	37	80	50	25	144	grass	grass	189.5	3	0.625	0.3125	High	High
B	4	15	punc	4	0.677031	25	34	8	8	127	grass	grass	106.1	1.2	0.235294	0.235294	Low	Low
B	5	20	punc	2	0.487462	18	74	47	47	195	grass	grass	195.5	0.6	0.635135	0.635135	High	High
B	6	25	punc	7	0.487462	18	38	30	30	151	grass	grass	99.7	1.2	0.789474	0.789474	High	High
B	7	30	punc	1	0.487462	18	54	10	10	81	goldenrod	mix	111.8	0.5	0.185185	0.185185	Low	Low
B	8	35	punc	1	0.568706	21	40	0	0	100	goldenrod	grass	110	0.8	0	0	None	None
B	9	40	punc	7	0.947844	35	24	4	3	101	goldenrod	forbs	107.6	3	0.166667	0.125	Low	Low
B	10	45	punc	2	1.46239	54	42	32	25	128	goldenrod	mix	191.8	2.6	0.761905	0.595238	High	High
B	11	50	punc	2	0.270812	10	14	0	0	104	grass	mix	166.3	1.1	0	0	None	None
B	1	0	perf	5	1.31502	56	120	3	0	106	grass	mix	140.5	1.8	0.025	0	Low	None
B	2	5	perf	5	0.986265	42	54	4	1	97	grass	mix	161	1.5	0.0740741	0.0185185	Low	Low
B	3	10	perf	3	1.22109	52	90	24	5	118	grass	mix	226.1	0.8	0.266667	0.0555556	Low	Low
B	4	15	perf	3	0.610545	26	26	8	8	111	grass	mix	156.8	0.3	0.307692	0.307692	High	High
B	5	20	perf	4	1.10368	47	82	41	36	106	grass	grass	159.1	0.8	0.5	0.439024	High	High
B	6	25	perf	3	0.46965	20	34	18	18	115	grass	mix	121.9	0.3	0.529412	0.529412	High	High
B	7	30	perf	3	0.84537	36	72	36	36	137	grass	grass	130.2	0.6	0.5	0.5	High	High
B	8	35	perf	5	1.00975	43	202	71	26	131	goldenrod	mix	104.2	2.6	0.351485	0.128713	High	Low
B	9	40	perf	4	0.798405	34	180	54	19	129	grass	mix	141.3	3.2	0.3	0.105556	High	Low
B	10	45	perf	5	1.12716	48	82	48	44	96	grass	grass	137.7	2.6	0.585366	0.536585	High	High
B	11	50	perf	3	0.798405	34	56	30	28	104	grass	grass	144.8	3.4	0.535714	0.5	High	High
C	1	0	punc	5	1.65196	61	34	4	0	97	forb	forbs	110.3	5	0.117647	0	Low	None
C	2	5	punc	4	1.05617	39	58	21	6	102	forb	forbs	167.5	2.3	0.362069	0.103448	High	Low
C	3	10	punc	3	1.76028	65	68	36	14	146	grass	grass	138.9	2.9	0.529412	0.205882	High	Low
C	4	15	punc	3	0.893681	33	78	68	61	186	grass	grass	110.4	1.7	0.871795	0.782051	High	High
C	5	20	punc	1	0.297894	11	30	12	12	138	grass	grass	150.2	0.1	0.4	0.4	High	High
C	6	25	punc	7	0.541625	20	36	36	36	144	goldenrod	mix	130.1	0.5	1	1	High	High
C	7	30	punc	1	0.21665	8	14	2	2	87	goldenrod	mix	151.6	0.1	0.142857	0.142857	Low	Low
C	8	35	punc	4	0.920762	34	46	25	21	129	goldenrod	mix	135	2.3	0.543478	0.456522	High	High
C	9	40	punc	5	1.05617	39	40	7	3	83	grass	mix	166.8	3	0.175	0.075	Low	Low
C	10	45	punc	6	1.02909	38	58	12	0	109	forb	mix	233.7	3.3	0.206897	0	Low	None
C	11	50	punc	*	*	*	*	*	*	91	grass	mix	266	*	.	.
C	1	0	perf	3	0.868852	37	94	28	4	98	forb	mix	95.4	0.1	0.297872	0.0425532	Low	Low
C	2	5	perf	4	1.54984	66	110	8	0	95	forb	grass	149	2.4	0.0727273	0	Low	None
C	3	10	perf	3	1.15064	49	162	69	63	68	grass	grass	139.2	1.2	0.425926	0.388889	High	High
C	4	15	perf	4	0.892335	38	64	39	36	75	grass	grass	173.4	0.5	0.609375	0.5625	High	High
C	5	20	perf	4	0.774922	33	48	28	28	74	grass	grass	173.5	0.4	0.583333	0.583333	High	High
C	6	25	perf	4	0.680992	29	80	56	56	71	grass	grass	121	0.6	0.7	0.7	High	High
C	7	30	perf	1	1.10368	47	94	58	58	110	goldenrod	mix	159.9	1	0.617021	0.617021	High	High
C	8	35	perf	3	0.610545	26	64	28	28	140	goldenrod	mix	143	1.2	0.4375	0.4375	High	High
C	9	40	perf	4	1.10368	47	172	124	115	88	grass	mix	156.3	1.7	0.72093	0.668605	High	High
C	10	45	perf	2	0.610545	26	36	1	0	130	goldenrod	grass	157.3	1.8	0.0277778	0	Low	None
C	11	50	perf	5	1.08019	46	136	67	65	93	grass	mix	180.7	2.9	0.492647	0.477941	High	High
D	1	0	punc	1	1.00201	37	42	3	0	114	forb	forbs	136.9	0.5	0.0714286	0	Low	None
D	2	5	punc	1	1.7332	64	126	6	0	96	forb	forbs	188.2	5.9	0.047619	0	Low	None
D	3	10	punc	2	2.05817	76	68	5	1	120	grass	grass	202.4	2.8	0.0735294	0.0147059	Low	Low
D	4	15	punc	1	1.27282	47	66	43	35	112	forb	forbs	228.8	1.1	0.651515	0.530303	High	High
D	5	20	punc	1	0.893681	33	18	16	10	135	grass	grass	157.5	0.4	0.888889	0.555556	High	High
D	6	25	punc	5	1.02909	38	20	4	0	108	grass	mix	150.8	2.1	0.2	0	Low	None
D	7	30	punc	2	1.38114	51	82	31	10	125	goldenrod	forbs	110.4	2	0.378049	0.121951	High	Low
D	8	35	punc	1	1.00201	37	80	62	58	121	grass	mix	151.1	0.9	0.775	0.725	High	High
D	9	40	punc	1	0.379137	14	36	24	24	126	forb	mix	118.6	0.1	0.666667	0.666667	High	High
D	10	45	punc	1	0.893681	33	32	0	0	120	forb	mix	208.3	0.6	0	0	None	None
D	11	50	punc	1	0.460381	17	38	3	2	130	forb	mix	113.9	0.3	0.0789474	0.0526316	Low	Low
D	1	0	perf	2	1.31502	56	80	26	21	126	forb	mix	123.7	0.2	0.325	0.2625	High	Low
D	2	5	perf	3	1.31502	56	100	47	32	87	grass	mix	187.2	0.8	0.47	0.32	High	High
D	3	10	perf	3	0.986265	42	70	6	2	117	goldenrod	mix	120.7	1.8	0.0857143	0.0285714	Low	Low
D	4	15	perf	6	0.9393	40	34	1	0	114	goldenrod	mix	109.1	1.8	0.0294118	0	Low	None
D	5	20	perf	4	1.05671	45	148	68	50	100	grass	grass	158.9	1.9	0.459459	0.337838	High	High
D	6	25	perf	3	1.12716	48	120	82	78	78	grass	grass	168.9	0.4	0.683333	0.65	High	High
D	7	30	perf	4	0.56358	24	40	36	34	143	goldenrod	mix	177.8	0.6	0.9	0.85	High	High
D	8	35	perf	4	0.680992	29	70	51	47	153	goldenrod	mix	144.1	1.1	0.728571	0.671429	High	High
D	9	40	perf	5	1.10368	47	106	52	40	110	goldenrod	mix	242	1.1	0.490566	0.377358	High	High
D	10	45	perf	3	0.868852	37	50	38	35	73	grass	grass	179.8	1	0.76	0.7	High	High
D	11	50	perf	5	1.17412	50	132	40	35	120	goldenrod	grass	253.5	1.7	0.30303	0.265152	High	Low
E	1	0	punc	1	1.54363	57	76	19	3	132	grass	forbs	237	1.5	0.25	0.0394737	Low	Low
E	2	5	punc	1	1.16449	43	66	18	6	152	goldenrod	forbs	297.7	1.3	0.272727	0.0909091	Low	Low
E	3	10	punc	2	1.57071	58	28	2	0	108	forb	mix	174.9	0.9	0.0714286	0	Low	None
E	4	15	punc	1	1.40822	52	72	44	36	121	forb	mix	120.7	1.2	0.611111	0.5	High	High
E	5	20	punc	1	1.08325	40	52	2	0	133	goldenrod	forbs	105.5	1.6	0.0384615	0	Low	None
E	6	25	punc	2	1.27282	47	70	2	0	130	forb	forbs	116.7	2	0.0285714	0	Low	None
E	7	30	punc	1	1.02909	38	26	3	0	115	forb	forbs	235.7	0.7	0.115385	0	Low	None
E	8	35	punc	1	1.54363	57	34	6	1	116	forb	mix	149.3	1.8	0.176471	0.0294118	Low	Low
E	9	40	punc	1	1.00201	37	74	15	2	134	teasle	mix	204	1.6	0.202703	0.027027	Low	Low
E	10	45	punc	1	0.839519	31	56	2	0	147	teasle	mix	137.1	0.6	0.0357143	0	Low	None
E	11	50	punc	1	0.947844	35	54	7	1	78	thistle	forbs	131.1	3.1	0.12963	0.0185185	Low	Low
E	1	0	perf	4	1.15064	49	96	12	1	103	forb	forbs	263.8	0.5	0.125	0.0104167	Low	Low
E	2	5	perf	6	1.43243	61	48	2	0	135	goldenrod	forbs	197.7	1.5	0.0416667	0	Low	None
E	3	10	perf	6	1.15064	49	72	3	0	142	goldenrod	forbs	242.8	0.9	0.0416667	0	Low	None
E	4	15	perf	9	1.57333	67	80	4	2	100	goldenrod	forbs	217.3	1.8	0.05	0.025	Low	Low
E	5	20	perf	4	0.915817	39	51	3	1	136	goldenrod	forbs	153.4	*	0.0588235	0.0196078	Low	Low
E	6	25	perf	*	*	*	*	*	*	147	goldenrod	grass	150.8	*	.	.
E	7	30	perf	*	*	*	*	*	*	86	grass	mix	248.5	*	.	.
E	8	35	perf	5	1.15064	49	26	3	0	87	goldenrod	mix	254	1.4	0.115385	0	Low	None
E	9	40	perf	4	1.10368	47	58	30	6	95	goldenrod	grass	158	1.5	0.517241	0.103448	High	Low
E	10	45	perf	4	0.798405	34	52	0	0	100	forb	grass	111.5	0.9	0	0	None	None
E	11	50	perf	4	1.05671	45	104	2	0	145	goldenrod	mix	243.5	2.6	0.0192308	0	Low	None
