# Supplementary material for: Spillover of a biological control agent (Chrysolina quadrigemina) onto native St. Johnswort (Hypericum punctatum)
Source: PeerJ. 2016 Mar 31;4:e1886. doi: 10.7717/peerj.1886 (PMC4824895; doi:10.7717/peerj.1886)
Supplement: Supplemental Information 3 [file peerj-04-1886-s003.xls]

## Sheet: Sheet1
Transect	plant	species	m to trees	# adult beetles	#larvae	# stalks	height tallest	# leaves	# damaged	# heavily damaged	notes	proportion damaged	proportion heavily damaged
NE1	1	perf	0	0	0	4	59	118	3	3	*	0.0254237	0.0254237
NE1	2	perf	0.4	0	0	2	62	182	0	0		0	0
NE1	3	perf	2.6	0	0	1	45	138	18	18		0.130435	0.130435
NE1	4	perf	2.6	0	0	1	57	248	200	200	*	0.806452	0.806452
NE1	5	perf	2.7	0	0	2	51	170	4	4		0.0235294	0.0235294
NE2	1	perf	3.2	0	0	1	60	214	6	6	bent up; spit bug nest	0.0280374	0.0280374
NE2	2	perf	3.4	0	0	1	43	178	1	1	*	0.00561798	0.00561798
NE1	6	perf	3.5	0	0	1	28	72	2	2		0.0277778	0.0277778
NE1	7	perf	3.8	0	0	4	40	78	3	3		0.0384615	0.0384615
NE2	3	perf	3.9	0	0	1	45	166	2	2		0.0120482	0.0120482
NE2	4	perf	3.9	0	0	1	35	54	2	2		0.037037	0.037037
DL2	1	perf	4.2	0	0	2	49	72	4	0	*	0.0555556	0
DL2	2	perf	4.2	0	0	2	50	68	1	0		0.0147059	0
NE2	5	perf	4.2	0	0	3	77	362	6	6		0.0165746	0.0165746
DL2	3	perf	4.3	0	0	1	51	68	0	0		0	0
N3	1	perf	6.4	0	0	1	87	560	6	6	*	0.0107143	0.0107143
DL1	1	perf	6.9	0	0	3	86	352	4	4	*	0.0113636	0.0113636
DL1	2	perf	7	0	0	2	86	278	4	4		0.0143885	0.0143885
N3	2	perf	8.6	0	0	3	48	78	3	3	spots of dead tissue on leaves	0.0384615	0.0384615
N3	3	perf	11.3	0	0	4	53	140	0	0		0	0
N3	4	perf	11.7	0	0	1	68	248	2	2		0.00806452	0.00806452
DL1	3	perf	12.8	0	0	3	88	492	21	21	*	0.0426829	0.0426829
DL1	4	perf	13.9	0	0	1	64	444	4	4		0.00900901	0.00900901
N2	1	perf	17.2	0	0	1	49	186	7	7	*	0.0376344	0.0376344
N1	1	perf	20.1	0	0	1	65	478	9	9		0.0188285	0.0188285
DL2	4	perf	20.8	0	0	5	76	358	17	17	*	0.047486	0.047486
N2	2	perf	21.5	0	0	2	46	112	1	1		0.00892857	0.00892857
N1	2	perf	22.2	0	0	1	52	156	0	0	*	0	0
F3	22	perf	25.4	0	0	7	40	136	87	87	*	0.639706	0.639706
F3	23	perf	25.5	0	0	2	35	80	16	16		0.2	0.2
F3	24	perf	25.6	0	0	17	56	318	212	212	saw shiny brown stingbug with Chrysolina	0.666667	0.666667
F3	25	perf	25.6	0	0	2	26	48	14	14		0.291667	0.291667
DL1	5	perf	26.1	0	0	1	68	318	15	15	*	0.0471698	0.0471698
N1	3	perf	28.6	1	0	1	67	256	111	111		0.433594	0.433594
N1	4	perf	28.6	0	0	1	39	66	26	26		0.393939	0.393939
N1	5	perf	28.7	0	0	1	59	196	71	71		0.362245	0.362245
F3	26	perf	28.8	1	0	48	65	258	106	106	*	0.410853	0.410853
DL2	5	perf	33.3	0	0	2	67	302	1	1		0.00331126	0.00331126
N2	3	perf	33.5	0	0	1	61	380	3	3	*	0.00789474	0.00789474
DL2	6	perf	33.9	0	0	4	76	338	5	5		0.0147929	0.0147929
N3	5	perf	35.7	1	0	1	52	170	66	66	*	0.388235	0.388235
N3	6	perf	36.5	0	0	2	44	74	16	16		0.216216	0.216216
N3	7	perf	36.8	0	0	1	56	180	66	66		0.366667	0.366667
N3	8	perf	37.1	0	0	2	46	106	0	0	many red leaves	0	0
DL1	6	perf	37.4	0	0	2	76	260	28	28	*	0.107692	0.107692
DL1	8	perf	37.5	0	0	2	74	430	2	2		0.00465116	0.00465116
DL1	7	perf	37.9	0	0	1	75	446	9	9		0.0201794	0.0201794
N3	9	perf	39.4	0	0	11	62	382	57	57		0.149215	0.149215
N1	6	perf	39.5	0	0	1	65	224	58	58		0.258929	0.258929
N3	10	perf	40.2	0	0	6	43	280	99	99	some leaves tied with silk	0.353571	0.353571
N3	11	perf	40.6	0	0	4	66	278	2	2		0.00719424	0.00719424
N2	4	perf	43.5	0	0	1	49	86	2	2	*	0.0232558	0.0232558
F2	13	perf	44	0	0	2	56	276	2	2	*	0.00724638	0.00724638
N1	7	perf	44.4	0	0	1	43	126	122	122		0.968254	0.968254
N1	8	perf	44.6	0	0	1	45	142	142	142	*	1	1
N3	12	perf	46	0	0	3	48	126	1	1	*	0.00793651	0.00793651
F2	12	perf	47.5	0	0	5	70	242	1	1	*	0.00413223	0.00413223
N1	9	perf	47.9	0	0	1	47	154	1	1		0.00649351	0.00649351
DL1	9	perf	51.8	0	0	1	63	200	9	9	*	0.045	0.045
N2	5	perf	54	0	0	1	45	92	67	67	*	0.728261	0.728261
DL2	7	perf	56.7	0	0	1	50	376	17	17		0.0452128	0.0452128
N3	13	perf	58.4	0	0	3	45	84	13	13	*	0.154762	0.154762
F2	14	perf	63.5	0	0	7	65	386	7	7	*	0.0181347	0.0181347
N2	6	perf	64.2	0	0	1	35	66	0	0	*	0	0
F2	15	perf	66.4	18	0	39	81	354	84	7	*	0.237288	0.019774
N1	10	perf	68.6	0	0	1	53	196	29	29		0.147959	0.147959
N3	14	perf	69.2	0	0	4	57	154	25	25	*	0.162338	0.162338
N2	7	perf	71.5	0	0	1	55	194	0	0		0	0
F1	69	perf	73.7	8	0	5	60	230	44	44	*	0.191304	0.191304
F1	70	perf	74.4	0	0	1	39	166	6	6		0.0361446	0.0361446
F2	16	perf	77.1	5	0	57	56	244	241	241		0.987705	0.987705
N3	15	perf	81.5	0	0	1	55	264	48	48	*	0.181818	0.181818
N3	16	perf	86.4	1	0	1	48	164	125	125		0.762195	0.762195
F3	32	perf	86.6	0	0	20	72	738	6	6	*	0.00813008	0.00813008
N2	8	perf	100	0	0	1	50	140	0	0		0	0
N2	9	perf	100	1	0	1	56	124	115	115	*	0.927419	0.927419
F2	1	punc	4	0	0	4	88	24	1	0		0.0416667	0
F1	1	punc	4.1	0	0	1	60	17	0	0		0	0
F1	2	punc	4.1	0	0	1	71	24	4	0		0.166667	0
F1	3	punc	4.1	0	0	1	67	24	4	0		0.166667	0
F1	4	punc	4.1	0	0	1	22	8	1	0		0.125	0
F2	2	punc	4.1	0	0	1	81	24	5	1		0.208333	0.0416667
F1	5	punc	4.4	.	.	.	.	.	.	.	eaten by deer	#VALUE!	#VALUE!
F2	3	punc	4.4	0	0	2	83	26	6	2	slug? *	0.230769	0.0769231
F3	1	punc	4.4	0	0	2	27	16	1	1		0.0625	0.0625
F1	6	punc	4.5	.	.	.	.	.	.	.	eaten by deer	#VALUE!	#VALUE!
F3	2	punc	4.8	0	0	1	50	20	10	2		0.5	0.1
F3	3	punc	4.9	0	0	1	26	14	0	0		0	0
F3	4	punc	4.9	0	0	1	35	14	4	0		0.285714	0
F3	5	punc	4.9	0	0	2	27	14	6	3		0.428571	0.214286
F3	6	punc	4.9	0	0	2	57	20	17	6		0.85	0.3
F3	7	punc	5	0	0	2	52	20	2	0	*	0.1	0
F1	10	punc	6.2	0	0	1	69	23	3	0	*	0.130435	0
F1	7	punc	6.4	0	0	1	45	23	3	0		0.130435	0
F1	8	punc	6.6	0	0	1	26	15	2	0		0.133333	0
F1	9	punc	6.8	0	0	1	51	17	0	0		0	0
F2	4	punc	7.2	0	0	1	53	20	2	1		0.1	0.05
F1	11	punc	7.5	0	0	1	14	10	1	0		0.1	0
F3	8	punc	7.6	0	0	2	44	18	17	11		0.944444	0.611111
F1	12	punc	7.8	0	0	1	17	13	3	0		0.230769	0
F3	10	punc	7.8	0	0	1	31	18	2	0		0.111111	0
F3	9	punc	8	0	0	3	32	18	14	5		0.777778	0.277778
F2	5	punc	8.3	.	.	.	.	.	.	.	eaten by deer	#VALUE!	#VALUE!
F3	11	punc	8.3	0	0	2	35	14	13	8		0.928571	0.571429
F2	6	punc	8.6	0	0	8	52	14	11	6	*	0.785714	0.428571
F3	12	punc	8.6	0	0	6	55	22	12	0		0.545455	0
F1	13	punc	9.2	0	0	1	27	14	2	0		0.142857	0
F1	14	punc	9.6	0	0	1	23	18	9	6		0.5	0.333333
WN1	1	punc	9.9	2	0	1	60	24	22	19	*	0.916667	0.791667
F1	15	punc	10.1	1	0	1	33	14	12	7		0.857143	0.5
F3	13	punc	10.3	0	0	2	13	12	0	0	*	0	0
F1	16	punc	10.4	0	0	1	36	19	19	14	*	1	0.736842
F3	15	punc	10.5	0	0	3	12	12	2	1		0.166667	0.0833333
F3	16	punc	10.5	0	0	6	20	16	3	0		0.1875	0
F3	14	punc	10.6	0	0	1	21	20	1	1		0.05	0.05
F1	17	punc	10.9	0	0	1	15	10	2	0		0.2	0
F1	18	punc	11	0	0	1	13	8	0	0		0	0
F1	19	punc	11	0	0	1	8	6	4	1		0.666667	0.166667
F1	20	punc	11.1	0	0	1	20	14	4	1		0.285714	0.0714286
F1	21	punc	11.4	0	0	1	9	10	5	4		0.5	0.4
F3	17	punc	11.5	0	0	1	21	16	2	0		0.125	0
F1	22	punc	12.3	0	0	1	16	12	9	8		0.75	0.666667
F1	23	punc	12.4	0	0	1	28	14	14	14		1	1
F1	24	punc	12.5	0	0	1	12	10	9	3		0.9	0.3
F1	25	punc	12.5	0	0	1	19	12	11	8		0.916667	0.666667
F1	26	punc	12.6	0	0	1	23	6	6	6		1	1
F1	27	punc	12.6	0	0	1	10	8	8	3		1	0.375
F1	28	punc	12.8	0	0	1	25	12	5	1		0.416667	0.0833333
F1	29	punc	12.9	0	0	1	26	12	12	9		1	0.75
F1	30	punc	12.9	0	0	1	37	16	15	6		0.9375	0.375
F3	18	punc	12.9	0	0	1	17	10	9	7		0.9	0.7
F3	19	punc	13	0	0	2	26	20	20	7		1	0.35
F1	31	punc	13.6	0	0	1	28	16	14	10		0.875	0.625
F2	7	punc	13.7	0	0	1	68	22	6	2		0.272727	0.0909091
F1	33	punc	13.9	0	0	1	15	16	7	3		0.4375	0.1875
F1	32	punc	14	0	0	1	31	16	9	4		0.5625	0.25
F1	34	punc	14	0	0	1	27	18	6	2		0.333333	0.111111
F2	8	punc	14.3	0	0	4	51	18	0	0		0	0
F1	35	punc	14.7	0	0	1	53	22	22	16		1	0.727273
F3	20	punc	14.8	0	0	4	50	24	4	0	*	0.166667	0
F2	9	punc	14.9	0	0	3	63	20	4	1	*	0.2	0.05
F1	36	punc	15.5	0	0	1	30	18	16	10	*	0.888889	0.555556
F1	37	punc	16.7	0	0	1	9	10	4	2		0.4	0.2
F1	38	punc	16.8	0	0	1	35	20	14	9		0.7	0.45
F1	39	punc	16.8	0	1	1	33	16	15	7		0.9375	0.4375
F1	40	punc	17.1	0	0	1	15	12	7	1		0.583333	0.0833333
F1	41	punc	17.4	0	1	1	59	22	4	0		0.181818	0
F1	42	punc	17.4	0	2	1	65	26	10	1		0.384615	0.0384615
F1	43	punc	17.4	0	1	1	28	16	14	3		0.875	0.1875
F1	44	punc	17.4	0	0	1	16	12	12	5		1	0.416667
F1	45	punc	17.4	0	0	1	30	18	17	8		0.944444	0.444444
F1	46	punc	17.4	0	0	1	14	8	6	4		0.75	0.5
F1	47	punc	17.4	0	1	1	79	22	15	2		0.681818	0.0909091
F1	48	punc	17.6	0	0	1	56	18	1	0		0.0555556	0
F1	49	punc	17.6	0	0	1	62	28	8	2		0.285714	0.0714286
F1	50	punc	18.4	0	0	1	68	22	16	0		0.727273	0
F1	51	punc	18.5	0	0	1	32	16	2	0		0.125	0
F1	52	punc	18.6	0	0	1	34	20	11	3		0.55	0.15
F1	53	punc	18.9	0	0	1	53	24	22	9		0.916667	0.375
F1	54	punc	18.9	0	0	1	61	24	18	5		0.75	0.208333
F1	55	punc	19	0	0	1	41	14	13	4	*	0.928571	0.285714
F2	10	punc	19.8	0	0	2	47	18	2	0	*	0.111111	0
F2	11	punc	20.6	0	0	9	58	20	9	4		0.45	0.2
F3	21	punc	22.6	0	0	1	15	10	5	1	*	0.5	0.1
F1	56	punc	23	0	0	1	10	8	6	1		0.75	0.125
F1	57	punc	23	0	0	1	18	12	4	0		0.333333	0
F1	58	punc	23.5	0	0	1	70	26	15	5		0.576923	0.192308
F1	59	punc	23.5	0	0	1	34	14	2	2		0.142857	0.142857
F1	60	punc	23.5	0	1	1	30	12	5	3		0.416667	0.25
F1	61	punc	23.5	0	0	1	35	14	9	8		0.642857	0.571429
F1	62	punc	23.9	0	0	3	87	26	18	9	*	0.692308	0.346154
F1	63	punc	27.5	1	1	1	53	20	10	2		0.5	0.1
F1	64	punc	27.5	0	0	1	37	20	7	0		0.35	0
F1	65	punc	27.5	0	0	1	59	22	2	0		0.0909091	0
F1	66	punc	27.9	1	0	1	72	24	24	16		1	0.666667
F1	67	punc	27.9	1	0	1	66	26	26	15		1	0.576923
F3	27	punc	30.4	0	0	3	52	34	33	17	*	0.970588	0.5
F1	68	punc	31.4	0	0	2	53	22	19	15	*	0.863636	0.681818
F3	28	punc	37.3	0	0	1	47	24	1	0		0.0416667	0
F3	29	punc	37.3	0	0	4	51	26	7	3		0.269231	0.115385
F3	30	punc	41.6	0	0	4	46	20	1	0	*	0.05	0
F3	31	punc	43.2	0	0	1	25	16	4	0		0.25	0
